# Supplementary material for: Silver Nanoparticle-Coated Polyhydroxyalkanoate Based Electrospun Fibers for Wound Dressing Applications
Source: MDPI journal article supplement (doi:10.3390/ma14174907), 2021-08-28
Supplement: s1 [file s1]

Supporting Information

# Silver Nanoparticle-Coated Polyhydroxyalkanoate Based Electrospun Fibers for Wound Dressing Applications

Ozlem Ipek Kalaoglu-Altan <sup>1,2</sup>, Havva Baskan <sup>1,2</sup>, Timo Meireman <sup>1</sup>, Pooja Basnett <sup>3</sup>, Bahareh Azimi <sup>4,5</sup>, Alessandra Fusco <sup>4,6</sup>, Niccola Funel <sup>7</sup>, Giovanna Donnarumma <sup>4,6</sup>, Andrea Lazzeri <sup>5</sup>, Ipsita Roy <sup>8</sup>, Serena Danti <sup>5</sup> and Karen De Clerck <sup>1,\*</sup>

<sup>1</sup> Department of Materials, Textiles and Chemical Engineering, Ghent University, 9000 Ghent, Belgium; kalaoglualtan@itu.edu.tr (O.I.K.-A.); baskan@itu.edu.tr (H.B.); timo.meireman@ugent.be (T.M.); karen.declerck@ugent.be (K.D.C.),

<sup>2</sup> Department of Textile Engineering, Istanbul Technical University, 34437 Istanbul, Turkey

<sup>3</sup> School of Life Sciences, College of Liberal Arts and Sciences, University of Westminster, London W1W 6UW, UK; p.basnett@westminster.ac.uk

<sup>4</sup> Department/Laboratory, Interuniversity National Consortiums of Materials Science and Technology (INSTM), 50121 Firenze, Italy; bahareh.azimi@ing.unipi.it (B.A.); alessandra.fusco@unicampania.it (A.F.); giovanna.donnarumma@unicampania.it (G.D.)

<sup>5</sup> Department of Civil and Industrial Engineering, University of Pisa, 56126 Pisa, Italy; andrea.lazzeri@unipi.it (A.L.); serena.danti@unipi.it (S.D.)

<sup>6</sup> Department of Experimental Medicine, University of Campania “Luigi Vanvitelli”, 80125 Naples, Italy

<sup>7</sup> Department of Translational Research and New Technologies in Medicine and Surgery, University of Pisa, 56126 Pisa, Italy; niccola.funel@gmail.com

<sup>8</sup> Faculty of Engineering, Department of Materials Science & Engineering, University of Sheffield, Sheffield S3 7HQ, UK; i.roy@sheffield.ac.uk

\* Correspondence: karen.declerck@ugent.be

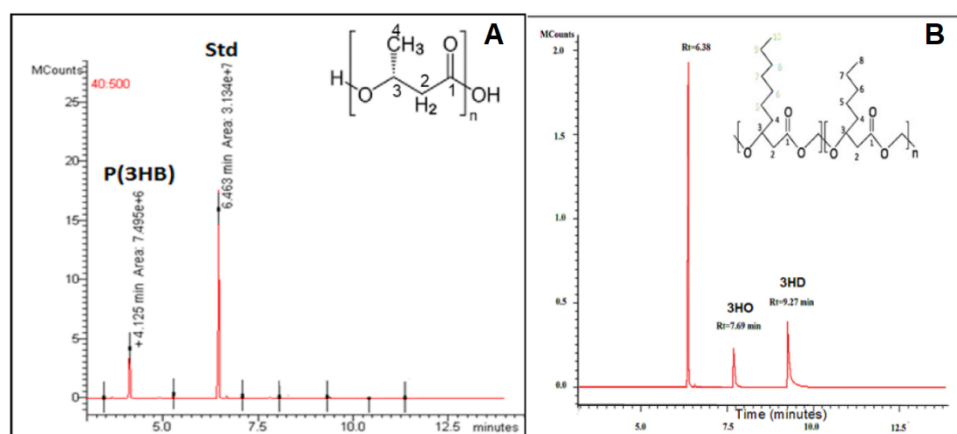

**Figure S1.** Gas Chromatography Mass Spectrometry (GCMS) results of (A) P(3HB), (B). P(3HO-co-3HD).

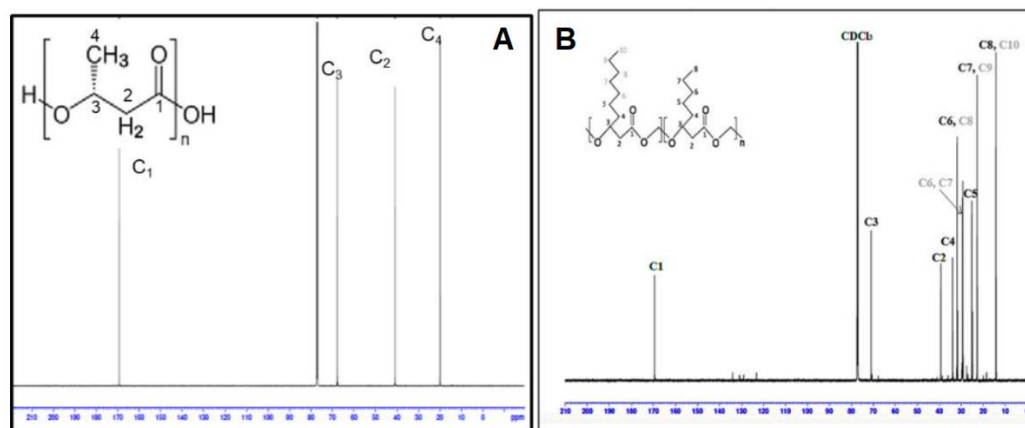

**Figure S2.**  $^{13}\text{C}$  Nuclear Magnetic Resonance (NMR) results of (A) P(3HB), (B) P(3HO-co-3HD).

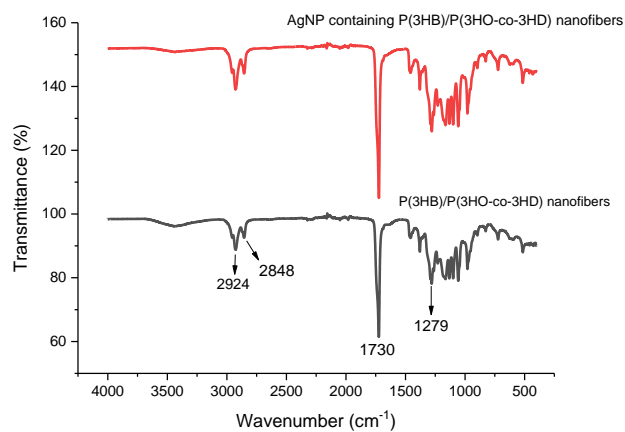

**Figure S3.** FTIR-ATR spectrum of neat P(3HB)/P(3HO-co-3HD) nanofibers (black) and Ag NPs containing P(3HB)/P(3HO-co-3HD) nanofibers (red).

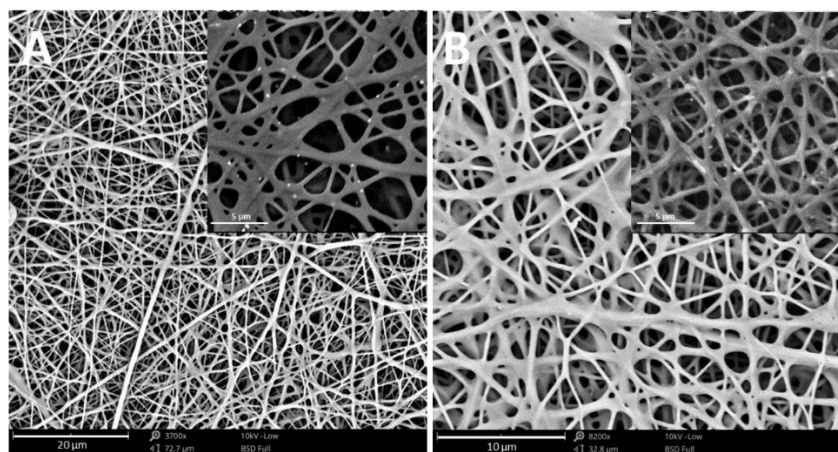

**Figure S4.** SEM images of AgNP-containing P(3HB)/P(3HO-co-3HD) nanofibers obtained by (A) protocol 1, (B) protocol 2. Images with higher magnifications are given as insets.
